# Supplementary material for: Histoplasmosis at a Reference Center for Infectious Diseases in Southeast Brazil: Comparison between HIV-Positive and HIV-Negative Individuals
Source: MDPI journal article supplement (doi:10.3390/tropicalmed8050271), 2023-05-10
Supplement: s1 [file s1]

## Supplementary

**Table S1.** Clinical specimens collected for culture in patients diagnosed with histoplasmosis, INI 2000–2018.

| Variables |                        |     | Diagnosis of HIV |           |                 |
|-----------|------------------------|-----|------------------|-----------|-----------------|
|           |                        |     | Negative         | Positive  | <i>p</i> -value |
| Culture   | Lymphnode biopsy       | No  | 34 (100)         | 58 (89.2) | 0.092           |
|           |                        | Yes | 0 (0)            | 7 (10.8)  |                 |
|           | Blood                  | No  | 30 (88.2)        | 44 (67.7) | 0.025           |
|           |                        | Yes | 4 (11.8)         | 21 (32.3) |                 |
|           | Bone Marrow            | No  | 31 (91.2)        | 41 (63.1) | 0.003           |
|           |                        | Yes | 3 (8.8)          | 24 (36.9) |                 |
|           | Skin Biopsy            | No  | 31 (91.2)        | 61 (93.8) | 0.689           |
|           |                        | Yes | 3 (8.8)          | 4 (6.2)   |                 |
|           | Bronchoalveolar Lavage | No  | 29 (85.3)        | 61 (93.8) | 0.268           |
|           |                        | Yes | 5 (14.7)         | 4 (6.2)   |                 |
|           | Sputum                 | No  | 31 (91.2)        | 60 (92.3) | 1               |
|           |                        | Yes | 3 (8.8)          | 5 (7.7)   |                 |
|           | Urine                  | No  | 34 (100)         | 64 (98.5) | 1               |
|           |                        | Yes | 0 (0)            | 1 (1.5)   |                 |
|           | Negative culture       | No  | 27 (79.4)        | 54 (83.1) | 0.653           |
|           |                        | Yes | 7 (20.6)         | 11 (16.9) |                 |
| Total     |                        |     | 34               | 65        |                 |

**Table S2.** Temporal comparison between obtaining the result of the culture and the date of hospitalization until death, INI 2000–2018.

| Variables                                |              | Diagnosis of HIV |               |                 |
|------------------------------------------|--------------|------------------|---------------|-----------------|
|                                          |              | Negative         | Positive      | <i>p</i> -value |
| Time to receive culture result (in days) | Median (IQR) | 12.5 (7-19.5)    | 13.5 (8.8-27) | 0.292           |
| Hospitalization time resulting in death  | Mean (SD)    | 12 (10,14)       | 6 (5,18.5)    | < 0.001         |

IQR = Interquartile Range; SD = Standard Deviation
